# Supplementary material for: PCM1 is necessary for focal ciliary integrity and is a candidate for severe schizophrenia
Source: PubMed Central journal article supplement (PMC7677393; doi:10.1038/s41467-020-19637-5), 2020-11-19
Supplement: 41467_2020_19637_MOESM1_ESM.pdf [file 41467_2020_19637_MOESM1_ESM.pdf]

**SUPPLEMENTARY FIGURES:**

**PCM1 is necessary for focal ciliary integrity and is a candidate for severe schizophrenia**

**Monroe et al.**

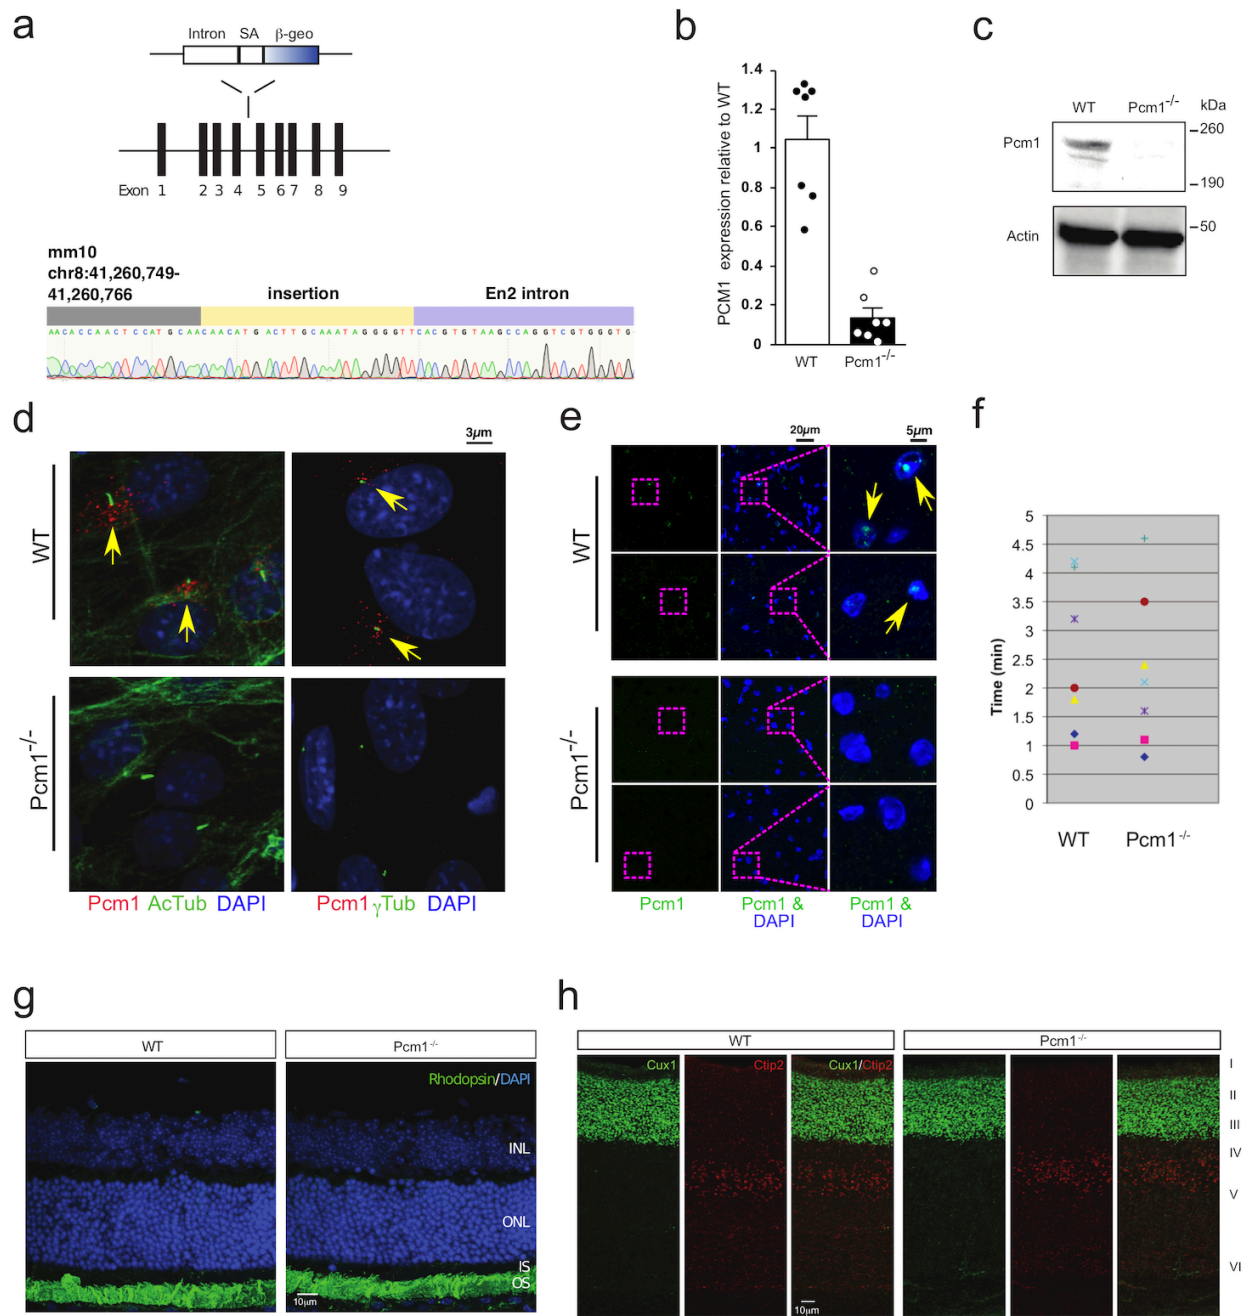

**Supplementary Figure 1. Characterization of *Pcm1*<sup>-/-</sup> mice.** **a** (Top) Gene trap diagram displaying the insertion of the gene trap cassette between exons four and five of the *Pcm1* gene. SA, splice acceptor;  $\beta$ -geo,  $\beta$ -galactosidase/Neomycin cassette. (Bottom) Sanger sequencing confirmation of the precise insertion site. **b** Quantitative RT-PCR analysis of *Pcm1* mRNA from WT and *Pcm1*<sup>-/-</sup> brain homogenates (N=7; means  $\pm$  SEM). **c** Immunoblots of cortical brain lysates from WT and *Pcm1*<sup>-/-</sup> mice. Antibodies against Pcm1 and actin are shown. **d** Primary lung fibroblasts were cultured and stained for Pcm1 and acetylated-tubulin (AcTub) or  $\gamma$ -tubulin ( $\gamma$ Tub). **e** Representative Pcm1 staining in mouse striatum. **d-e** Arrows indicate the characteristic speckled pattern of Pcm1 localization that is not present in WT cells. **f** Hidden cereal olfactory test (no genotype difference in the time required to find the hidden cereal, N=7). **g** Representative immunohistochemical staining of retinal sections from WT and *Pcm1*<sup>-/-</sup> mice with rhodopsin and DAPI staining revealing no robust differences between genotypes. **h** Representative staining with Cux1 and Ctip2 show normal cortical lamination in P4 *Pcm1*<sup>-/-</sup> brain sections. Cortical layers (I to VI) are indicated. Source data and detailed statistical information are provided as a Source Data File

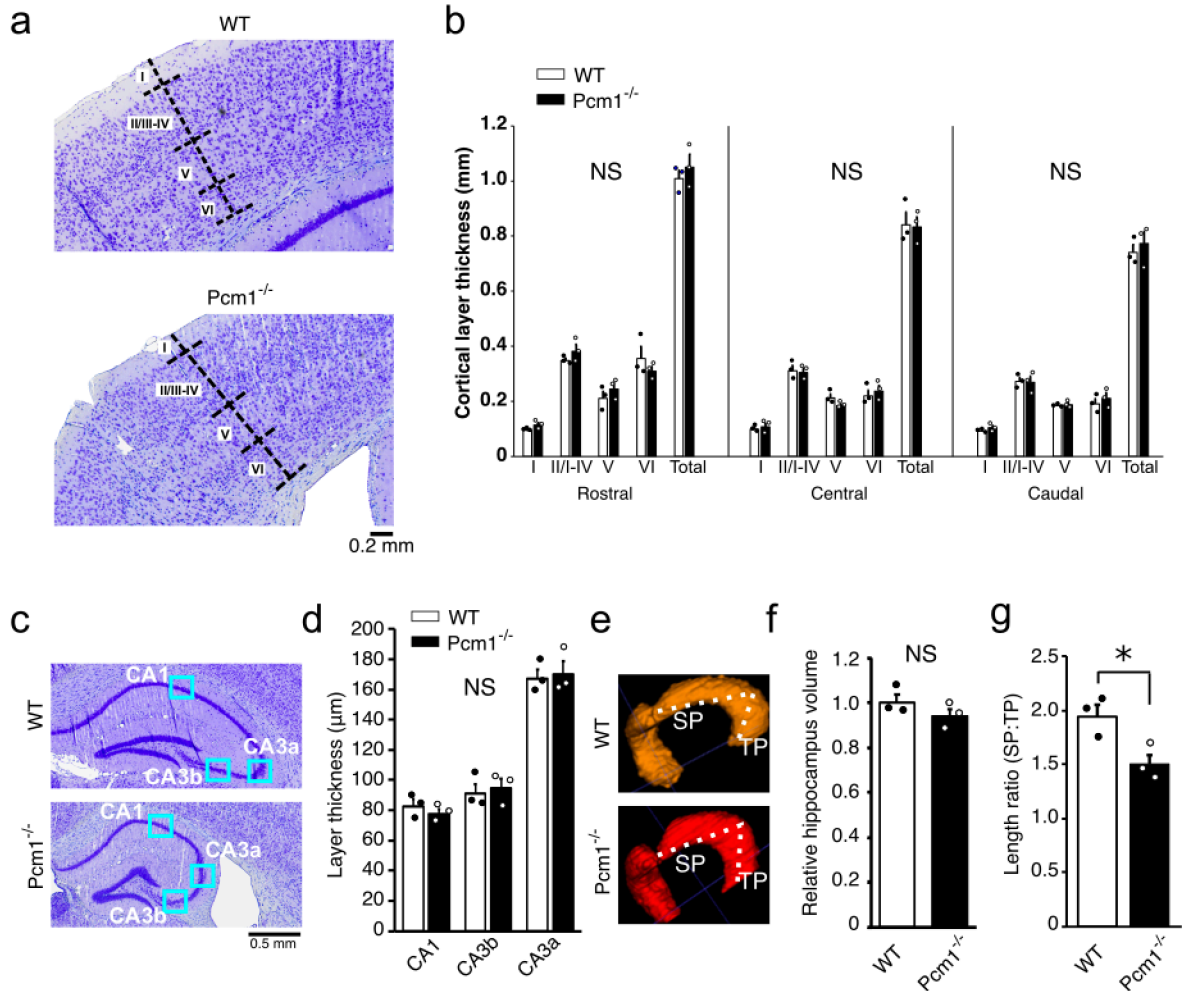

**Supplementary Figure 2. Continued neuroanatomical analysis.** **a** Representative Cresyl violet histological sections from WT and *Pcm1*<sup>-/-</sup> cortex showing the cell layers. **b** Cortical layer thickness from different cortical regions (N=4). **c** Representative Cresyl violet histological sections from WT and *Pcm1*<sup>-/-</sup> hippocampus with different regions annotated. **d** Hippocampal layer thickness from the indicated regions in panel c (N=4). **e** Representative volumetric views of the hippocampi, with septal poles (SP) and temporal poles (TP), and their lengths indicated (dots). **f** Relative hippocampal volume (N=3). **g** Ratio of hippocampal septal pole to temporal pole length (N=3;  $p=0.036$ ). Two-sided t-tests without adjustments. Data presented as means  $\pm$ SEM; \* $p<0.05$ , WT vs. *Pcm1*<sup>-/-</sup>. Source data and detailed statistical information are provided as a Source Data File



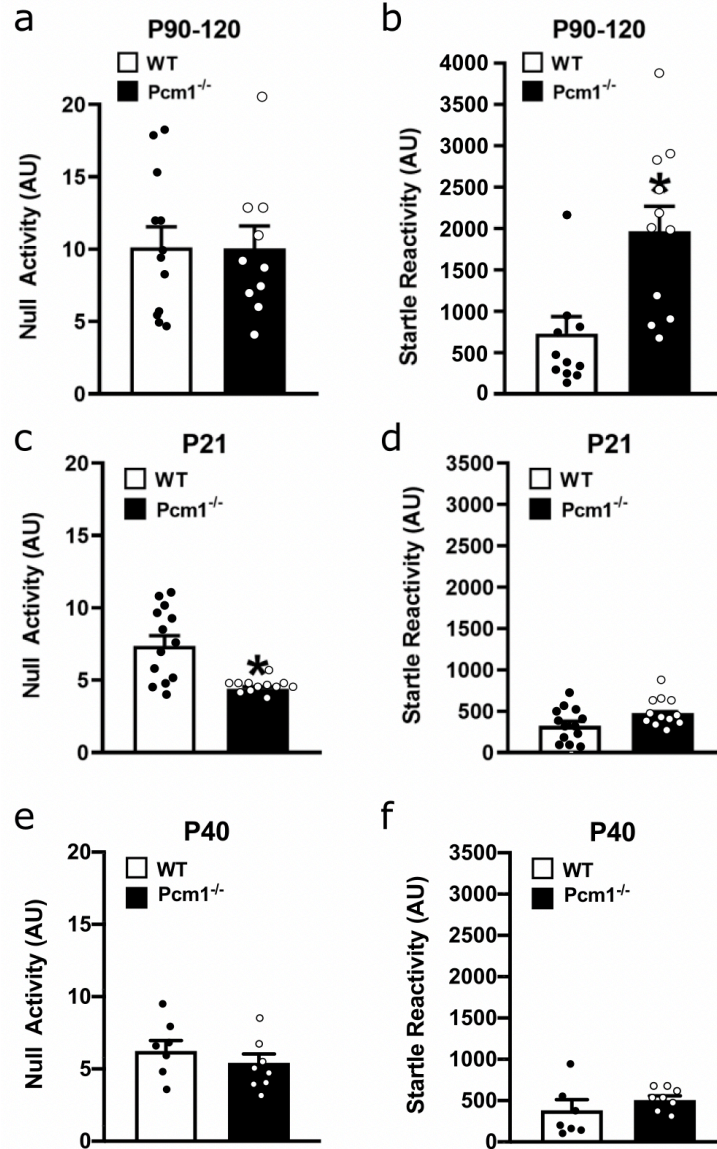

**Supplementary Figure 3. Developmental PPI null and startle in *Pcm1*<sup>-/-</sup> mice.** **a.** Null activity in P90-120 WT and *Pcm1*<sup>-/-</sup> mice (N=11 and 12 mice/genotype). **b.** Startle activity in P90-120 mice (N=11 and 12 mice/genotype; p=0.003). **c.** Null activity in P21 WT and *Pcm1*<sup>-/-</sup> mice (N=12 and 13 mice/genotype; p<0.001). **d.** Startle activity in P21 mice. (N=12 and 13 mice/genotype). **e.** Null activity in P40 WT and *Pcm1*<sup>-/-</sup> (N=7 and 8 mice/genotype) **f.** Startle activity in P40 mice. (N=7 and 8 mice/genotype). a-f Data presented as means ±SEM. Two-sided T-tests without adjustment, \*p<0.05, WT vs. *Pcm1*<sup>-/-</sup>. Source data and detailed statistical information are provided as a Source Data File

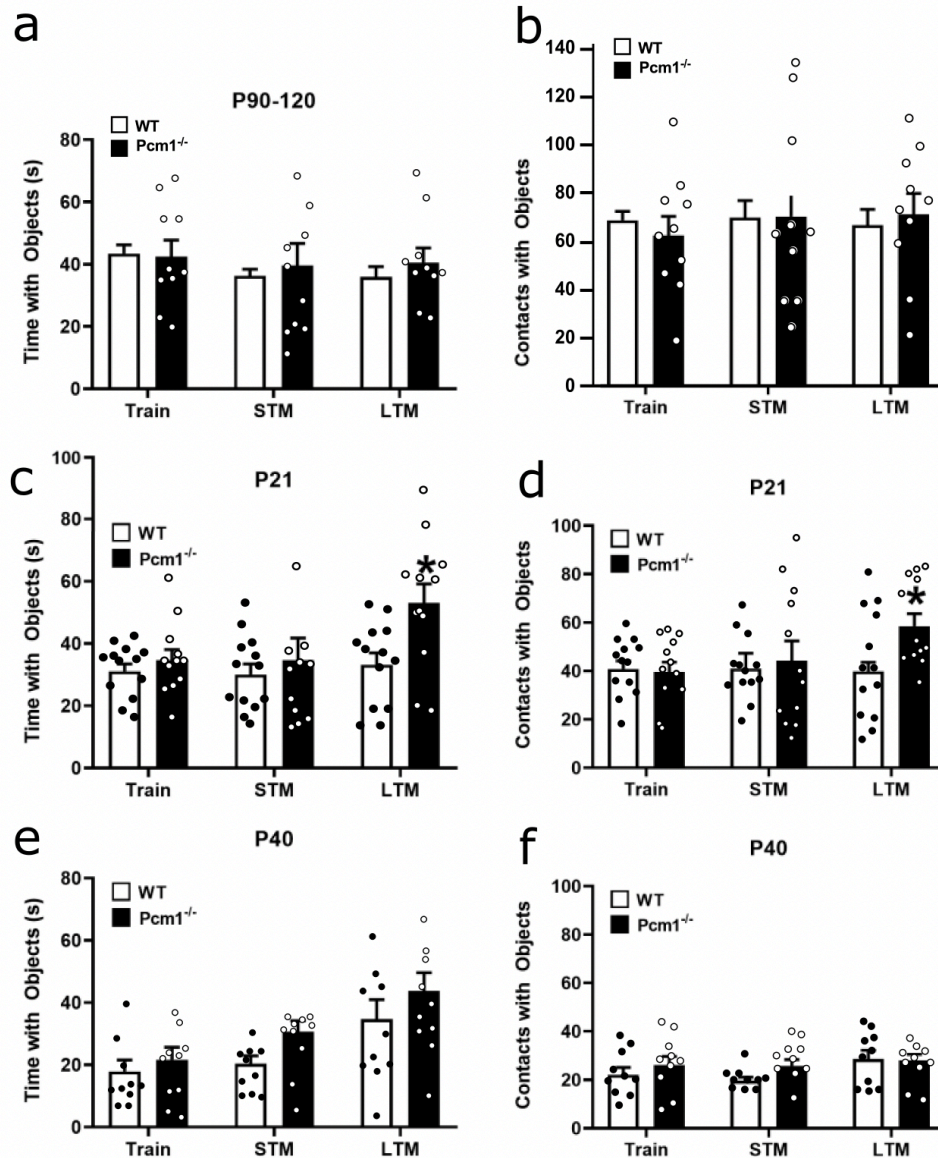

**Supplementary Figure 4. Developmental novel object recognition memory numbers and duration of object contacts in *Pcm1*<sup>-/-</sup> mice.** **a** Time with objects for P90-120 WT and *Pcm1*<sup>-/-</sup> mice (N=10 and 14 mice/genotype). **b** Numbers of contacts for P90-120 mice (N=10 and 14 mice/genotype). **c** Time with objects for P21 WT and *Pcm1*<sup>-/-</sup> mice (N=12 and 13 mice/genotype; p=0.021 (test phase x genotype)). **d** Numbers of object contacts for P21 mice (N=12 and 13 mice/genotype; p=0.007 test phase x genotype). **e** Time with objects for P40 WT and *Pcm1*<sup>-/-</sup> mice (N=10 mice/genotype; overall main effect of test, p=0.001). **f** Numbers of object contacts for P40 mice (N=10 mice/genotype). Data presented as means  $\pm$  SEM. RMANOVA, \*p<0.05, WT vs. *Pcm1*<sup>-/-</sup>. Source data and detailed statistical information are provided as a Source Data File



**Supplementary Figure 5. Cilia from WT and *Pcm1*<sup>-/-</sup> at P4 and in P90 mice; and *PCM1* RNA levels in the human and mouse brain.** **a** Normal cilia morphology in P4 WT and *Pcm1*<sup>-/-</sup> brain sections. Representative hippocampal regions are shown at low and high magnification. **b** Bulbous cilia in the adult (P90) WT and *Pcm1*<sup>-/-</sup> brain, with emphasis on the septum, striatum, hippocampus, and amygdala. **c** Both Arl13b and AC3 antibodies stain bulbous cilia with similar intensities suggesting that both proteins localize at similar levels in brain regions from *Pcm1*<sup>-/-</sup> mice. **d** Profiling for *PCM1* RNA expression during the development of the human brain. Abbreviations: NCX, neocortex; STR, striatum; HIP, hippocampus; MD; AMY, amygdala; and CBC, cerebral cortex. **e** *In situ* hybridizations showing *Pcm1* expression in the adult mouse brain in various regions. Data extracted from the Allen Brain Atlas<sup>45</sup>

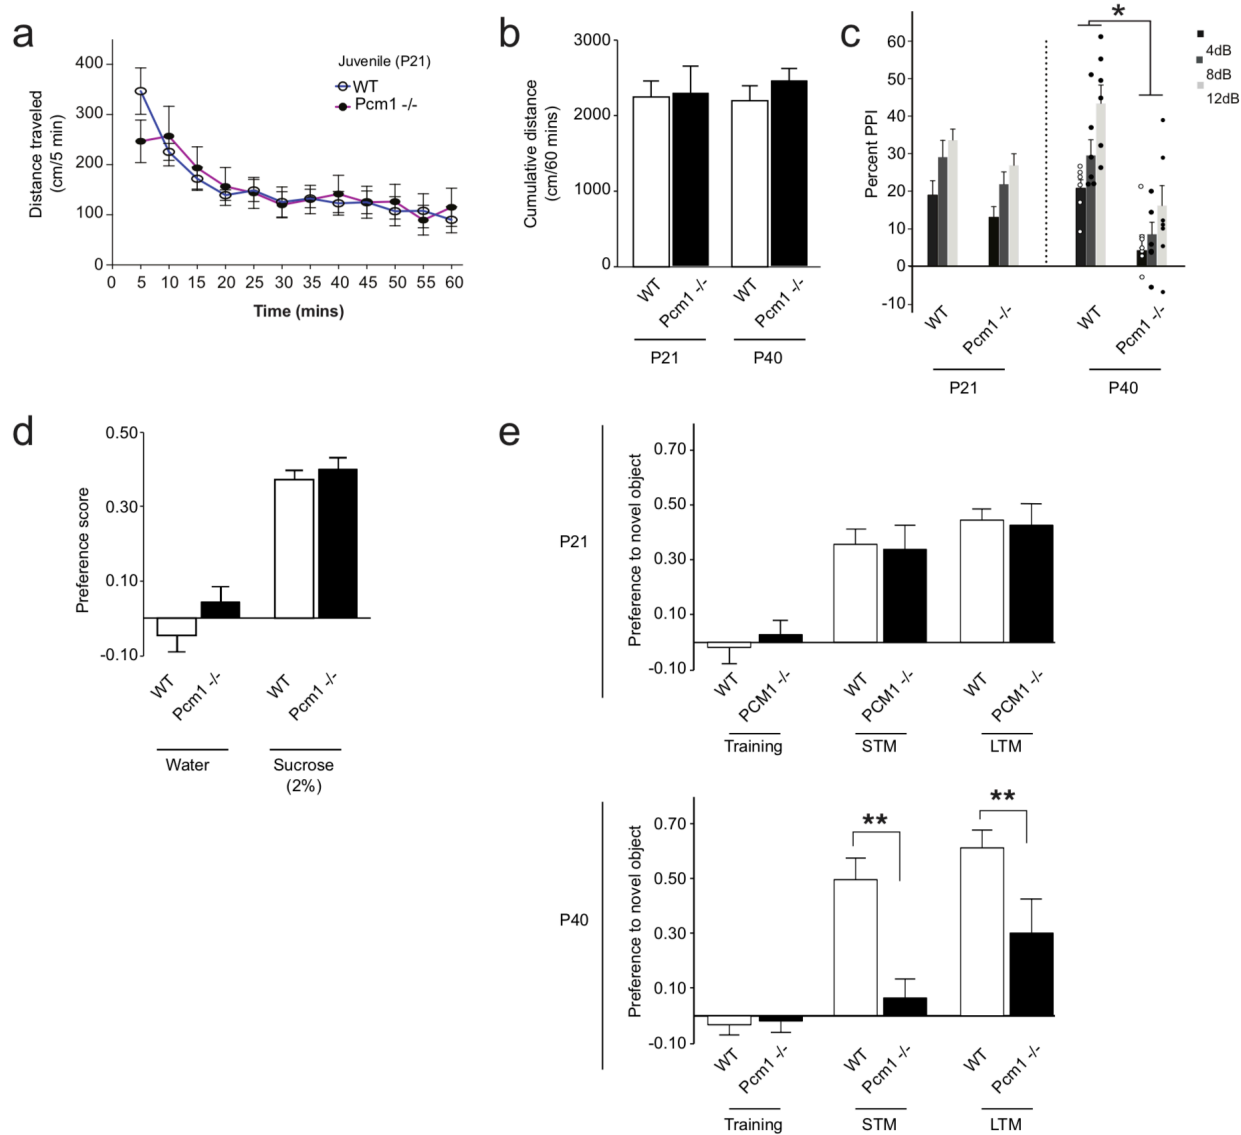

**Supplementary Figure 6. Developmental behavioral responses in *Pcm1*<sup>-/-</sup> mice.** **a** Open field locomotor activity over time in P21 mice (first study, N=7 mice/genotype). **b** Cumulative open field locomotion in P21 mice (a second, replicated experiment of panel a) and in P40 mice (N=12 and 14 mice/genotype). **c** PPI in juvenile (P21-28) and prepubescent (P40) *Pcm1*<sup>-/-</sup> mice. (P21, N=12 and 13 mice/genotype; P40, N=6 and 7 mice/genotype;  $p=0.029$  intensity  $\times$  genotype;  $p<0.001$  overall genotype). **d** Anhedonia-like behavior in P40 mice (N=12 and 14 mice/genotype). **e** Performance in the novel object recognition memory test in P21 and P40 mice (P21 N= 13 and 12 mice/genotype; P40, N=10 mice/genotype,  $p<0.013$  test interval  $\times$  genotype;  $p<0.001$ , overall genotype). Data as means  $\pm$ SEM. RMANOVA, \* $p<0.05$ , \*\* $p<0.01$ , WT vs. *Pcm1*<sup>-/-</sup>. Source data and detailed statistical information are provided as a Source Data File

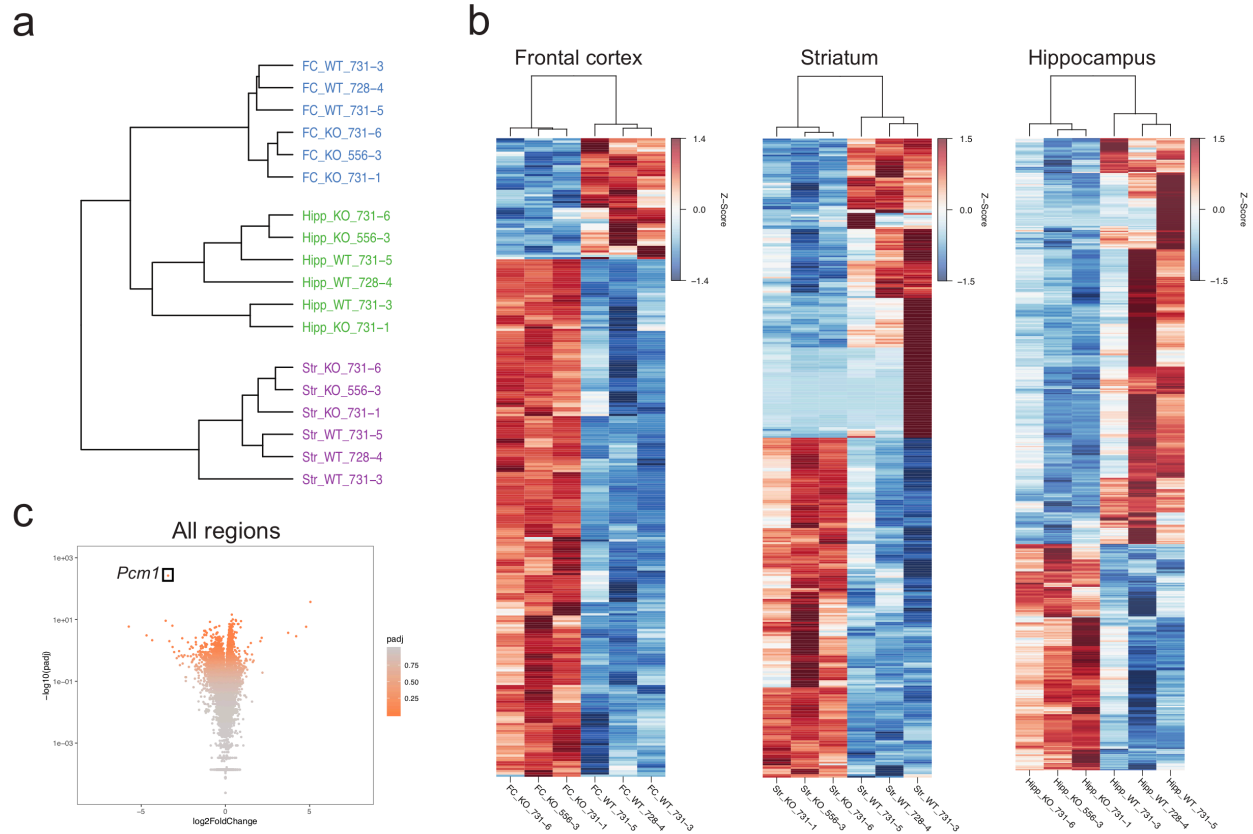

**Supplementary Figure 7. RNA-seq heat maps and hierarchical clustering.** **a** Hierarchical clustering was performed using the correlation distance with complete linkage of samples. Expression values were normalized and both the samples and genes were clustered using correlation distance with complete linkage. **b** Heat map shows all genes that are differentially expressed (FDR q-value  $\leq 0.05$ ) between each of the conditions. **c** Volcano plot indicating adjusted p-value relative to fold change in the normalized RNA-seq reads when considering all regions in *Pcm1*<sup>-/-</sup> relative to WT. *Pcm1* is highlighted with a box. RNA-seq data has been made publicly available



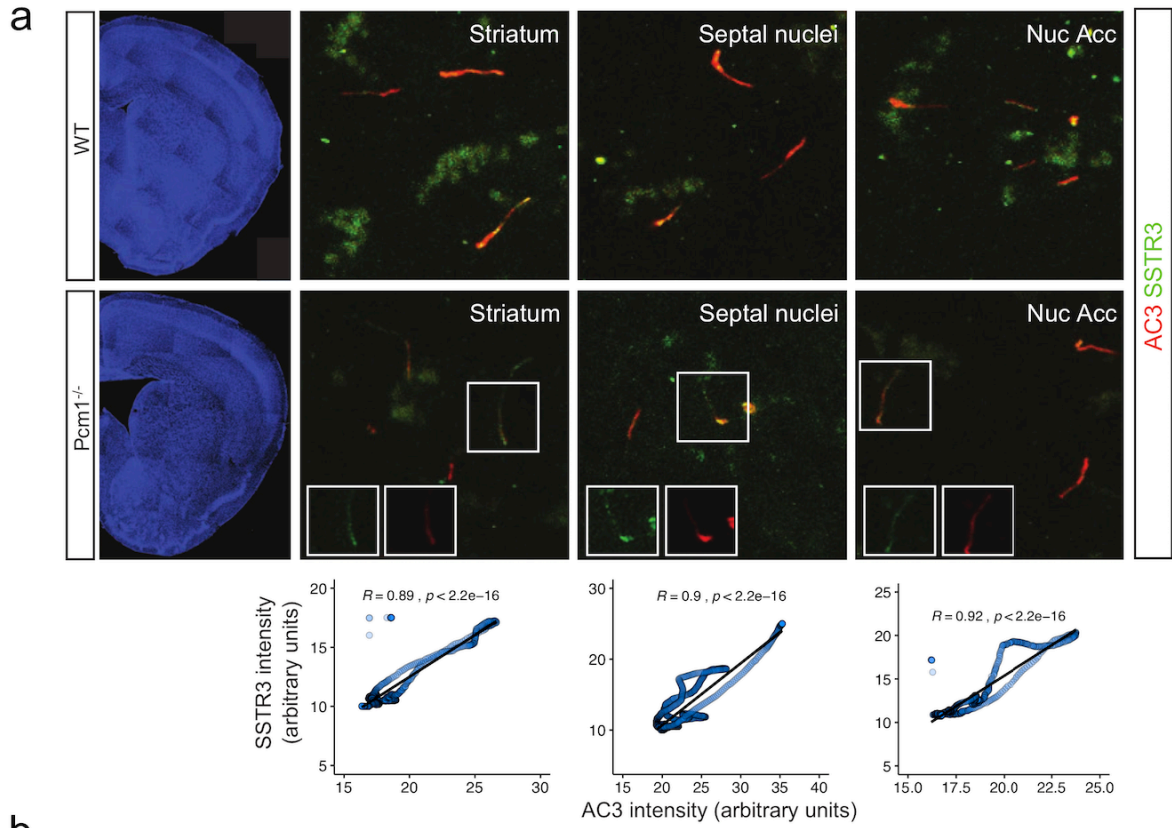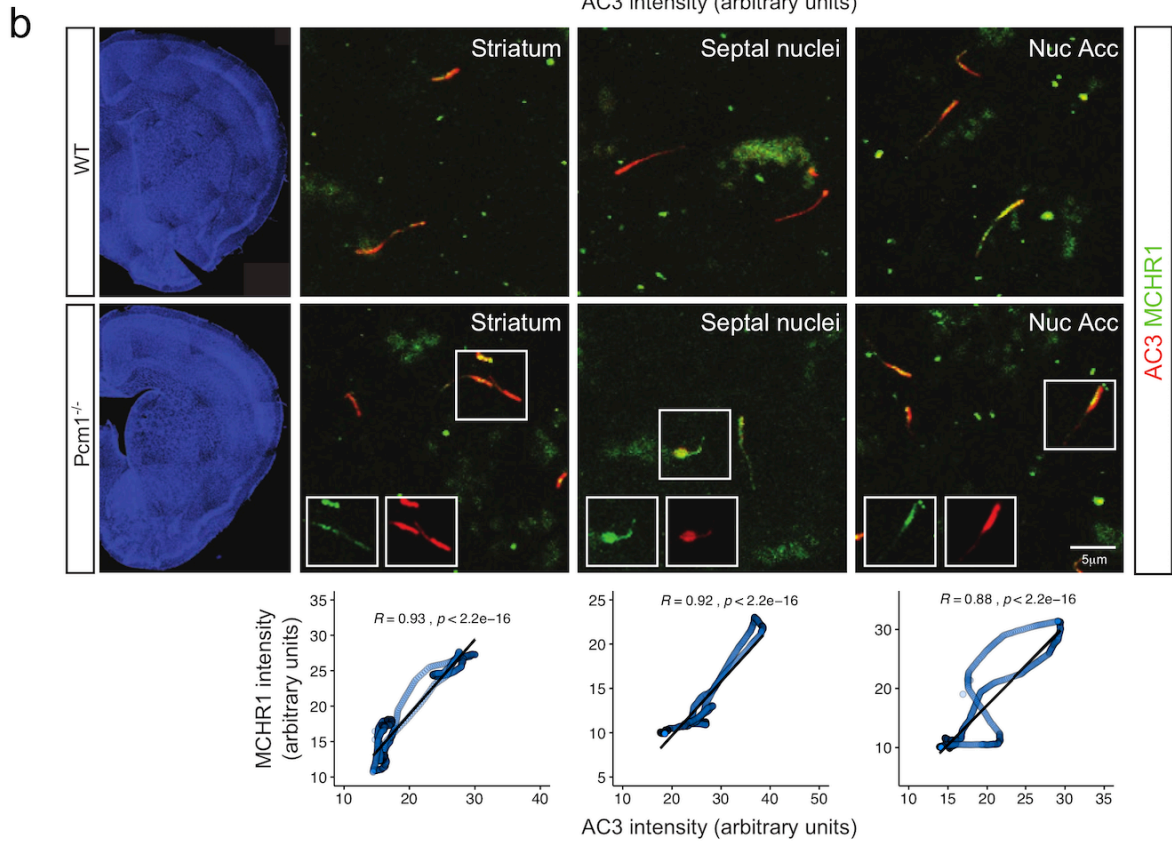

**Supplementary Figure 8. Representative cilia stained with AC3, SSTR3, and MCHR1 in brains from WT and *Pcm1*<sup>-/-</sup> mice.** **a** IHC staining of rostral brain regions for SSTR3 and the cilia (AC3). **b** IHC staining of rostral brain regions for MCHR1 and the cilia (AC3). All *Pcm1*<sup>-/-</sup> images are shown with intensity quantile-quantile plots (below), along with theoretical reference lines for the indicated regions, confidence intervals as grey shading, and Pearson correlation statistic, with the associated p-values. Source data and detailed statistical information are provided as a Source Data File



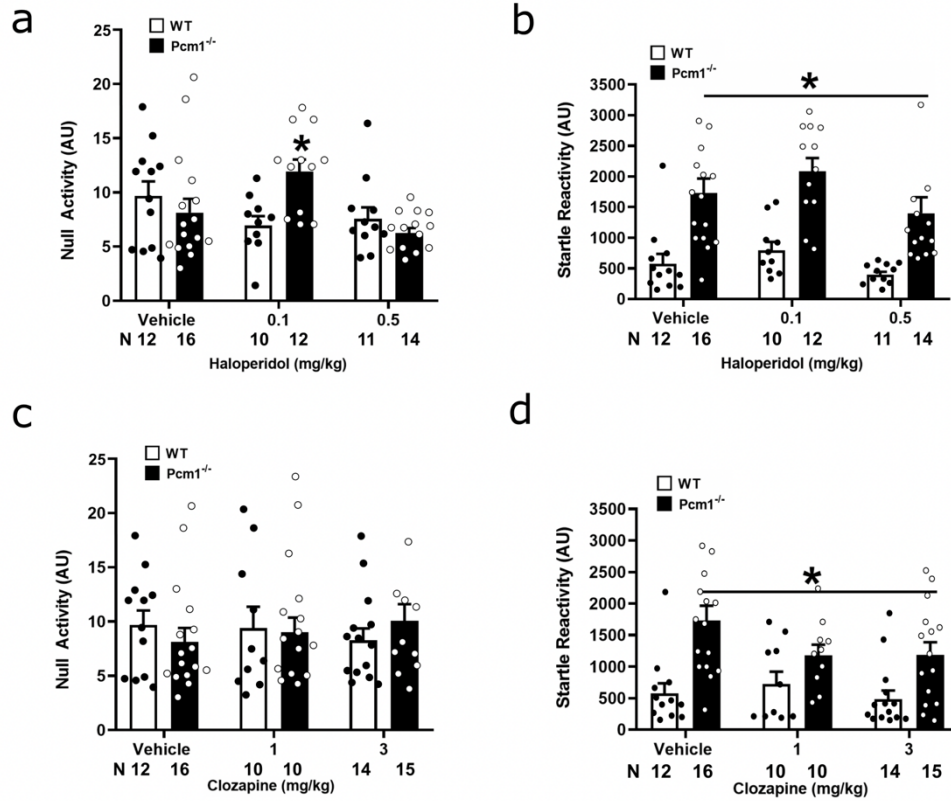

**Supplementary Figure 9. PPI null and startle responses in WT and *Pcm1*<sup>-/-</sup> mice treated with antipsychotic drugs.** **a** Null activity in adult WT and *Pcm1*<sup>-/-</sup> mice treated with the vehicle, or 0.1 or 0.5 mg/kg haloperidol (N shown in figure mice/genotype,  $p=0.007$  (treatment x genotype)). **b** Startle activity in adult WT and *Pcm1*<sup>-/-</sup> mice treated with the vehicle or haloperidol (N=10 and 16 mice/genotype,  $p<0.001$  (genotype)). **c** Null activity in adult WT and *Pcm1*<sup>-/-</sup> mice treated with the vehicle, or 1 or 3 mg/kg clozapine. **d** Startle activity in adult WT and *Pcm1*<sup>-/-</sup> mice treated with the vehicle or clozapine (N shown in figure;  $p<0.001$  (genotype)). ANOVA, \* $p<0.05$ , WT vs. *Pcm1*<sup>-/-</sup>. Source data and detailed statistical information are provided as a Source Data File

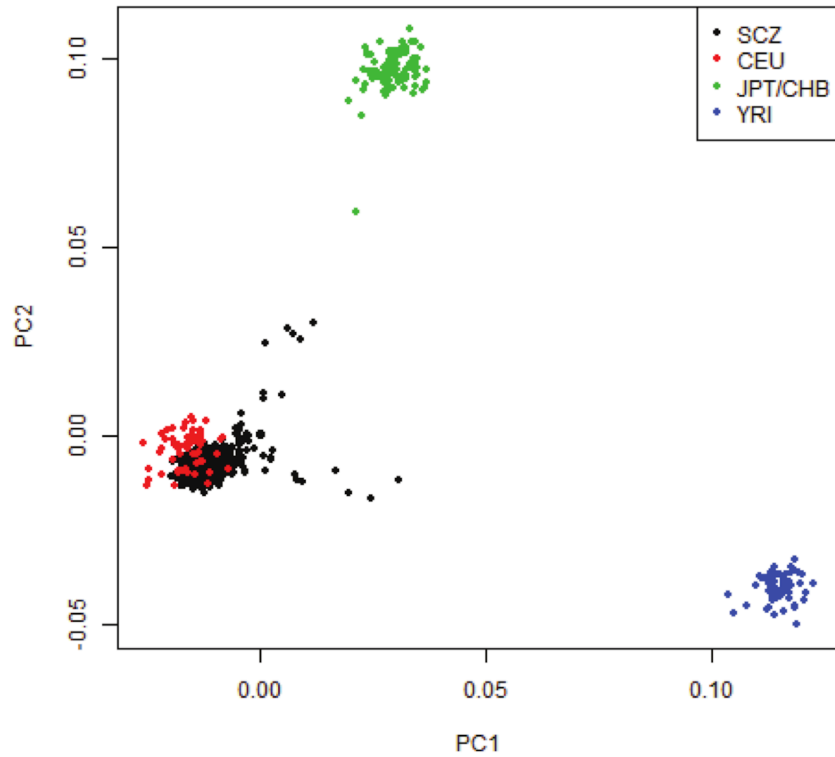

**Supplementary Figure 10. Principal component analysis (PCA) plot.** An examination of the population substructure among study samples shows that the SZ cohort is most similar to Northern Europeans. Abbreviations: CEU, Utah residents with ancestry from northern and western Europe; YRI, Yoruba in Ibadan, Nigeria; JPT, Japanese in Tokyo, Japan; and CHB, Han Chinese in Beijing, China.

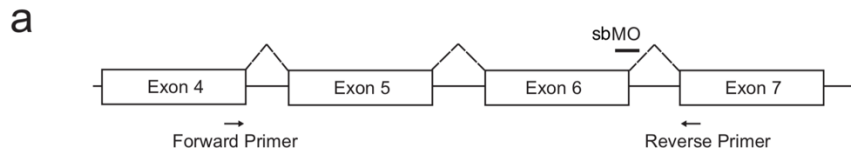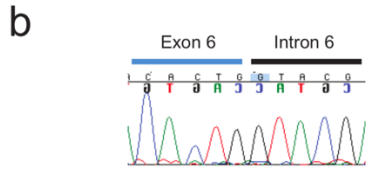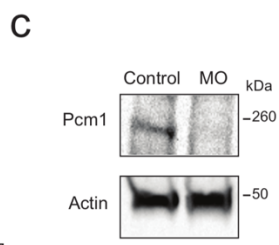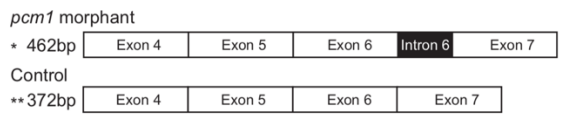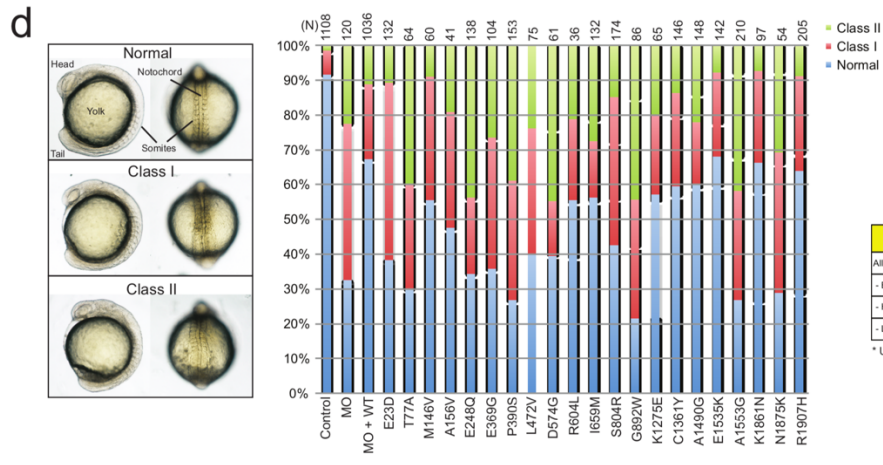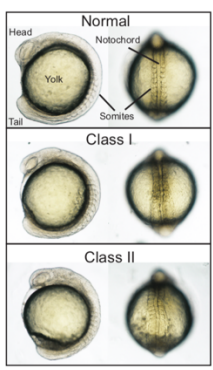

**e**

| Subset                      | N variants (Cases) | N variants (Controls) | Unweighted p-value | Odds ratio |
|-----------------------------|--------------------|-----------------------|--------------------|------------|
| All nonsynonymous variants* | 16                 | 5                     | 0.0209             | 3.007      |
| - Benign                    | 5                  | 4                     | 0.7526             | 1.219      |
| - Hypomorph                 | 4                  | 1                     | 0.2175             | 3.016      |
| - Loss of function          | 7                  | 0                     | 0.0076             | 15.155     |

\* Ultra-rare = MAF < 0.1%

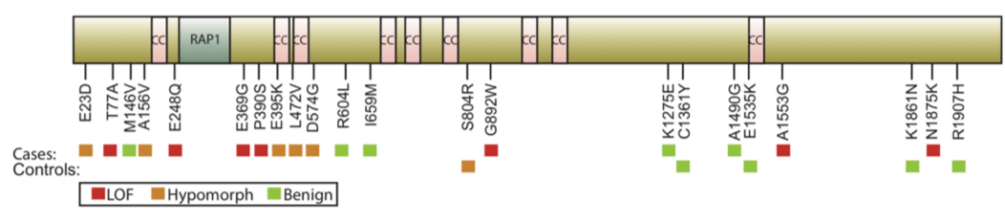

**Supplementary Figure 11. Analysis of *pcm1* suppression in zebrafish and CE phenotypes**

**a** Schematic of the zebrafish *pcm1* gene showing where the splice blocking morpholino (sbMO) targets the 3' aspect of exon 6. **b** Sequencing chromatogram from PCRs after gel purification using forward and reverse primers on cDNA (panel **a**) from 36 hpf wild-type (WT) and MO. The chromatograms are displayed and show a retained intron 6 in the *pcm1* mRNA from MO-injected embryos. **c** Immunoblot showing the effect of the translation-blocking morpholino (tbMO) on zebrafish *pcm1* protein levels. **d** Images from zebrafish embryos highlighting normal and two classes of convergence and extension phenotypes. Class II phenotypes are more severe than Class I phenotypes in that the distance between the head and tail is greater and widening of the notochord is more evident. Representative results from convergence and extension phenotypes in zebrafish showing control, MO, or MO + WT human *PCM1* RNA rescue conditions (N shown in figure). **e** Results from gene-based association tests of *PCM1* and *ASZ* using ultra-rare functional variants. Source data and detailed statistical information are provided as a Source Data File

**SUPPLEMENTARY TABLES:**

| Variant        | Nucleotide position | Chromosome 8 position (hg19) | <i>p</i> -value from MO | <i>p</i> -value from MO+WT | N  | Functional effect | Allele Frequency (gnomAD) |
|----------------|---------------------|------------------------------|-------------------------|----------------------------|----|-------------------|---------------------------|
| G6D            | G17A                | 17793136                     | 0.067                   | <0.0001                    | 43 | loss of function  | NA                        |
| E23D           | G69C                | 17793188                     | 0.0004                  | 0.0007                     | 39 | hypomorph         | 0.000312                  |
| T77A           | A229G               | 17794775                     | 0.57                    | <0.0001                    | 46 | loss of function  | NA                        |
| M146V          | A436G               | 17796342                     | <0.0001                 | 0.13                       | 40 | benign            | NA                        |
| A156V          | C467T               | 17796373                     | <0.0001                 | 0.0099                     | 41 | hypomorph         | 0.002916                  |
| M200T          | T599C               | 17796505                     | 0.28                    | <0.0001                    | 40 | loss of function  | NA                        |
| M200I          | G600A               | 17796506                     | 0.0022                  | 0.0049                     | 35 | hypomorph         | 8.13E-06                  |
| D214G          | A641G               | 17797228                     | 0.0005                  | 0.0013                     | 42 | hypomorph         | NA                        |
| E248Q          | G742C               | 17797329                     | 0.53                    | <0.0001                    | 31 | loss of function  | 6.3E-06                   |
| E311Q          | G931C               | 17804842                     | 0.0012                  | 0.0036                     | 50 | hypomorph         | NA                        |
| E369G          | A1106G              | 17810513                     | 0.05                    | <0.0001                    | 41 | loss of function  | NA                        |
| P390S          | C1168T              | 17810575                     | 0.38                    | <0.0001                    | 29 | loss of function  | 4.23E-06                  |
| L472V          | C1414G              | 17813104                     | 0.039                   | 0.0003                     | 39 | hypomorph         | 4.01E-06                  |
| G482V          | G1445T              | 17813135                     | 0.0002                  | 0.0012                     | 47 | hypomorph         | 1.2E-05                   |
| E543K          | G1627A              | 17814267                     | <0.0001                 | 0.64                       | 31 | benign            | 7.5E-05                   |
| D574G          | A1721G              | 17814847                     | 0.0044                  | 0.0021                     | 39 | hypomorph         | NA                        |
| R604L          | G1811T              | 17815055                     | <0.0001                 | 0.55                       | 51 | benign            | NA                        |
| E624K          | G1870A              | 17815114                     | <0.0001                 | 0.58                       | 48 | benign            | 0.001153                  |
| I659M          | C1977G              | 17815221                     | <0.0001                 | 0.62                       | 41 | benign            | NA                        |
| S804R          | A2410C              | 17819630                     | <0.0001                 | 0.69                       | 48 | benign            | 0.000106                  |
| R833T          | G2498C              | 17820644                     | <0.0001                 | 0.71                       | 45 | benign            | 4.06E-06                  |
| C876R          | T2626C              | 17820772                     | 0.0033                  | 0.59                       | 44 | benign            | 8.86E-05                  |
| G892W          | G2674A              | 17822097                     | 0.16                    | 0.0007                     | 47 | loss of function  | 4.02E-06                  |
| E917G          | A2750G              | 17822077                     | 0.19                    | <0.0001                    | 30 | loss of function  | NA                        |
| K954N          | G2862C              | 17823514                     | <0.0001                 | 0.92                       | 30 | benign            | 4.7E-05                   |
| N1125S         | A3374G              | 17824641                     | <0.0001                 | 0.11                       | 39 | benign            | 0.001218                  |
| K1275E         | A3823G              | 17830076                     | <0.0001                 | 0.32                       | 56 | benign            | 0.000729                  |
| H1352Y         | A4055T              | 17838211                     | 0.012                   | 0.0045                     | 33 | hypomorph         | NA                        |
| C1361Y         | G4082A              | 17838238                     | 0.0003                  | 0.61                       | 43 | benign            | 4.07E-06                  |
| A1490G         | C4469G              | 17847426                     | <0.0001                 | 0.55                       | 41 | benign            | 2.57E-05                  |
| E1535K         | G4603A              | 17849122                     | <0.0001                 | 0.59                       | 42 | benign            | NA                        |
| A1553G         | C4658G              | 17849177                     | 0.0015                  | 0.0034                     | 48 | hypomorph         | 1.79E-05                  |
| G1556D         | G4667A              | 17849186                     | 0.36                    | <0.0001                    | 42 | loss of function  | NA                        |
| K1861N         | A5583C              | 17871544                     | <0.0001                 | 0.13                       | 44 | benign            | 4.41E-06                  |
| N1875K         | T5625G              | 17872133                     | 0.087                   | <0.0001                    | 44 | loss of function  | 0.001343                  |
| R1907H         | G5720A              | 17872228                     | <0.0001                 | 0.12                       | 40 | benign            | 6.42E-05                  |
| P1913L         | C5738T              | 17872246                     | 0.75                    | 0.0027                     | 43 | loss of function  | 0.0001                    |
| A1979S         | G5935T              | 17883053                     | 0.72                    | 0.0027                     | 31 | loss of function  | 0.000228                  |
| M597V (Common) | A1789G              | 17814915                     | <0.0001                 | 0.62                       | 46 | benign            | 0.733165                  |
| A691S (Common) | G2071T              | 17817553                     | <0.0001                 | 0.74                       | 34 | benign            | 0.139014                  |

**Supplementary Table 1. *PCM1* variants discovered in the severe SZ cohort.** Zebrafish results and statistics from variants co-injected with the *pcm1* MO. Genomic loci according to GRCh37 (hg19), allele frequencies retrieved from gnomAD 02/07/2020). Source data and detailed statistical information are provided as a Source Data File

## Frontal Cortex

| Rank | Pathway                                                           |
|------|-------------------------------------------------------------------|
| 1    | Neuropeptide binding                                              |
| 2    | Neuropeptide receptor activity                                    |
| 3    | Synaptogenesis                                                    |
| 4    | Hormone activity                                                  |
| 5    | Amine receptor activity                                           |
| 6    | G protein signaling coupled to cyclic nucleotide second messenger |
| 7    | G protein coupled receptor activity                               |
| 8    | Cyclic nucleotide mediated signaling                              |
| 9    | Rhodopsin like receptor activity                                  |
| 10   | Neurotransmitter binding                                          |

## Striatum

| Rank | Pathway                                             |
|------|-----------------------------------------------------|
| 1    | Glutamate receptor activity                         |
| 2    | Amine receptor activity                             |
| 3    | Glutamate signaling pathway                         |
| 4    | Synaptogenesis                                      |
| 5    | Protein amino acid n-linked glycosylation           |
| 6    | Anion transport                                     |
| 7    | Transmembrane receptor protein phosphatase activity |
| 8    | G protein coupled receptor activity                 |
| 9    | Glycoprotein biosynthetic process                   |
| 10   | Rhodopsin like receptor activity                    |

## Hippocampus

| Rank | Pathway                             |
|------|-------------------------------------|
| 1    | Neurotransmitter receptor activity  |
| 2    | Acetylcholine binding               |
| 3    | Neuropeptide binding                |
| 4    | Neuropeptide receptor activity      |
| 5    | Neurotransmitter binding            |
| 6    | Amine receptor activity             |
| 7    | Rhodopsin like receptor activity    |
| 8    | Synaptic transmission               |
| 9    | G protein coupled receptor activity |
| 10   | Transmission of nerve impulse       |

**Supplementary Table 2. Pathway enrichment analysis of WT and *Pcm1*<sup>-/-</sup> brain regions.** Ranking of pathways most significantly altered in the frontal cortex, striatum, and hippocampus from WT and *Pcm1*<sup>-/-</sup> brains. Source data and detailed statistical information are provided as a Source Data File

### Frontal Cortex

| Pathway        | p-value |
|----------------|---------|
| Depression     | 0.042   |
| Schizophrenia  | 0.004   |
| Mental illness | 0.025   |

### Striatum

| Pathway        | p-value |
|----------------|---------|
| Depression     | 0.034   |
| Mental illness | 0.013   |

### Hippocampus

| Pathway        | p-value |
|----------------|---------|
| Schizophrenia  | < 0.001 |
| Mental illness | 0.001   |
| Depression     | 0.037   |

**Supplementary Table 3. Psychiatric disorder gene-set enrichment analysis on genes altered in *Pcm1*<sup>-/-</sup> brains.** Comparison of mutant mouse transcriptomes with expression profiling of genes found to be dysregulated in human psychiatric disorders. Source data and detailed statistical information are provided as a Source Data File
